# Supplementary material for: Ferroelectric solar cells based on inorganic–organic hybrid perovskites
Source: Royal Society of Chemistry journal article supplement (doi:10.1039/c5ta01325a), 2015-01-01
Supplement: c5ta01325a1.pdf [file c5ta01325a1.pdf]

## Electronic Supplementary Information

### Ferroelectric solar cells based on inorganic–organic hybrid perovskite

Bo Chen,<sup>\*a</sup> Jian Shi,<sup>b</sup> Xiaojia Zheng,<sup>\*a</sup> Yuan Zhou,<sup>a</sup> Kai Zhu,<sup>c</sup> Shashank Priya<sup>\*a</sup>

a, Center for Energy Harvesting Materials and System, Virginia Tech, Blacksburg, Virginia 24061, United States

b, Department of Materials Science and Engineering, Rensselaer Polytechnic Institute, Troy, New York 12180, United States

c, Chemical and Nanoscience Center, National Renewable Energy Laboratory, Golden, Colorado 80401, United States

Corresponding author: bochen09@vt.edu, xiaojia@vt.edu, spriya@vt.edu

### Experimental details:

#### *Materials and Sample Preparation:*

Preparation of MAPbX<sub>3</sub> Perovskite Solution: Methylamine (27.86 ml, 40% in methanol, TCI) and hydroiodic acid (30 ml, 57 wt% in water, Sigma-Aldrich) were mixed at 0°C and stirred for 2 h. The precipitate was recovered by evaporation at 50°C for 1 h. The methylammonium iodide (CH<sub>3</sub>NH<sub>3</sub>I) was washed with diethyl ether three times and finally dried at 60°C in a vacuum oven for 24 h. CH<sub>3</sub>NH<sub>3</sub>I and PbCl<sub>2</sub> (99.999%, Sigma-Aldrich) were dissolved in anhydrous N,N-Dimethylformamide (DMF) at a 3:1 molar ratio of CH<sub>3</sub>NH<sub>3</sub>I to PbCl<sub>2</sub>, to produce a 40 wt% mixed halide perovskite (MAPbI<sub>3-x</sub>Cl<sub>x</sub>) precursor solution. The mixture solution was stirred at room temperature for 10 min just before using. For MAPbI<sub>3</sub> precursor, the prepared MAI and PbI<sub>2</sub> (Sigma-Aldrich) were added in a mixture of DMF and DMSO (7:3 v/v) for 0.8M; for MAPbBr<sub>3</sub> precursor, MABr powders (Lumtec) and PbBr<sub>2</sub> (Sigma-Aldrich) were added in a mixture of DMF and DMSO (7:3 v/v) for 0.8M MAPbBr<sub>3</sub> solution. The resulting MAPbI<sub>3</sub> and MAPbBr<sub>3</sub> precursor solutions were stirred overnight before using.

Preparation of the compact TiO<sub>2</sub> layer solution: 369 µL of titanium isopropoxide (99.99% Sigma-Aldrich) were added into 2.53 mL of ethanol, at the same time, 35 µL of a 2 M HCl solution were added into 2.53 mL of ethanol in another vial. The second solution was then added dropwise to the first solution and then stirring for 1 h. The mixture was filtered with a PTFE 0.2 µm filter.

### *Device Fabrication:*

Fluorine-doped tin oxide (FTO) coated glasses ( $7\Omega/\text{sq}$ , Sigma-Aldrich) used in this study were ultrasonically cleaned with acetone, ethanol and deionized water, and then dried with a nitrogen stream. The compact  $\text{TiO}_2$  blocking layer was spin-coated on the FTO substrate at 2,000 rpm for 20 s using the mildly acidic titanium isopropoxide solution and heated at  $500^\circ\text{C}$  for 15 min. Either the bare FTO or FTO with 30 nm gold thin film was used as the substrate to deposit the mesoporous  $\text{Al}_2\text{O}_3$  layer by spin-coating the diluted  $\text{Al}_2\text{O}_3$  paste ( $\text{Al}_2\text{O}_3$  paste (Sigma-Aldrich, 702129): ethanol=1:6 wt %) at 5000 RPM for 45 s. The  $\text{Al}_2\text{O}_3$  layers were then sintered at  $150^\circ\text{C}$  for 30 minutes in air before using.  $\text{MAPbI}_{3-x}\text{Cl}_x$  perovskite solution was spin-coated on the substrates (cp- $\text{TiO}_2$  coated FTO or mp- $\text{Al}_2\text{O}_3$  coated FTO) at 2000 rpm for 30 s, and then annealed at  $90^\circ\text{C}$  for 1 h and  $100^\circ\text{C}$  for 30 minutes in air.  $\text{MAPbI}_3$  (or  $\text{MAPbBr}_3$ ) perovskite solutions were coated onto the substrate by a two-step spin-coating process at 1,000 rpm for 10 and 4,000 rpm for 20 s, respectively. At the end of the second spin-coating step, the substrate was treated with toluene drop-casting. The obtained samples were dried on a hot plate at  $100^\circ\text{C}$  for 10 min in glove box. Finally, 100 nm of gold was thermally evaporated on the perovskite film. The active area of each device was  $0.1\text{ cm}^2$ .

### *Characterization:*

Piezoelectric force microscopy (PFM) was performed using a scanning probe station (Bruker Dimension Icon, USA) with conductive Platinum-Iridium coated tip (SCM-PIT, Bruker). All the piezoelectric phase mappings were conducted under resonance-enhanced mode. In order to investigate the polarization switching behavior of domains, either a positive or negative DC bias was applied using the scanning tip on the specimen. For local hysteresis loop measurement, the out-of-plane piezoelectric response was measured at selected locations on the ferroelectric film surface as a function of DC bias superimposed on the AC modulation bias. The AC drive amplitude was 1000 mV ( $\sim 300\text{ kHz}$ ) during the DC bias sweep.

Photovoltaic performance of the solar cells were analyzed under one sun ( $\text{AM } 1.5\text{G}$ ,  $100\text{ mW}/\text{cm}^2$ ) illumination with a solar simulator (150 W Sol 2A<sup>TM</sup>, Oriel). During the measurement, different bias voltages were applied on the solar cell for 10 s to pole the perovskite thin film, and then solar cells were short circuited for 5 s after poling to avoid the effect of capacitive charging during the poling; subsequently, the current-voltage characteristics of each cell were recorded with a Keithley digital source meter (model 2400).

Scanning electron microscopy images were obtained from scanning electron microscopy (SEM, Quanta 600 FEG, FEI Company) operated at an accelerating voltage of 5 kV.

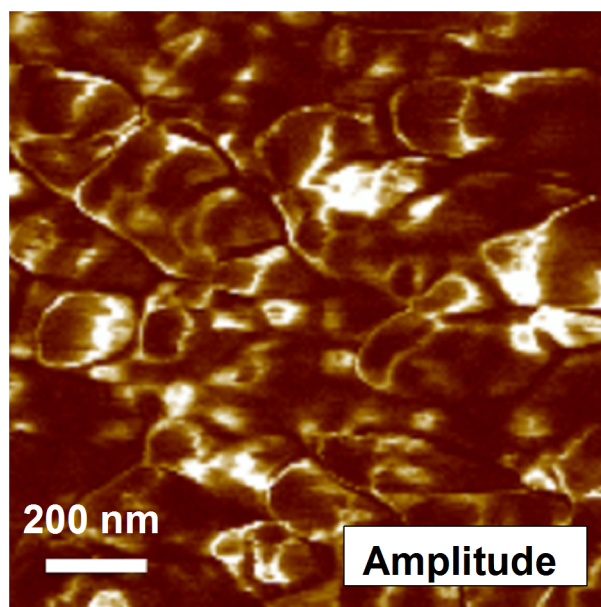

**Fig. S1.** PFM amplitude image of the as-grown  $\text{MAPbI}_{3-x}\text{Cl}_3$  thin film in Fig. 1a.

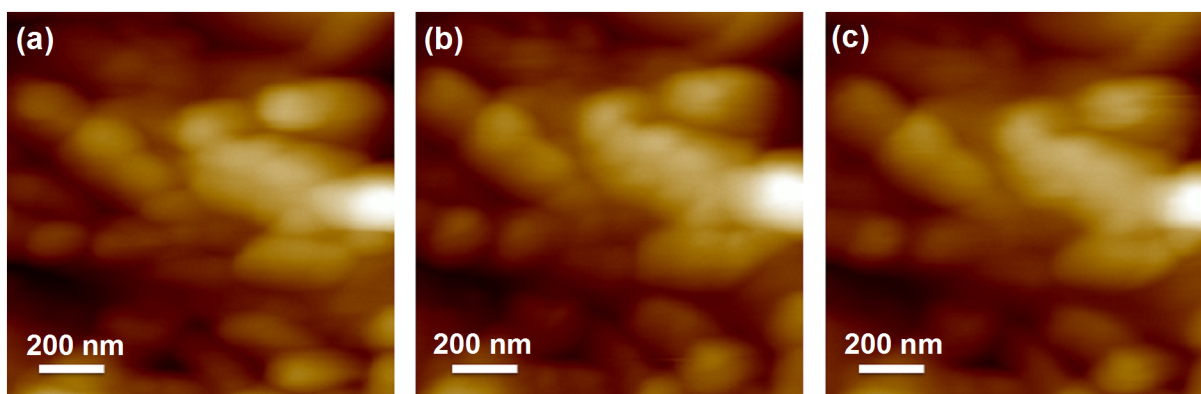

**Fig. S2:** PFM topology for the MAPbI<sub>3</sub> thin film after +5V poling, -5V poling, and +5V poling as shown in Fig 1d, e, and f, respectively.

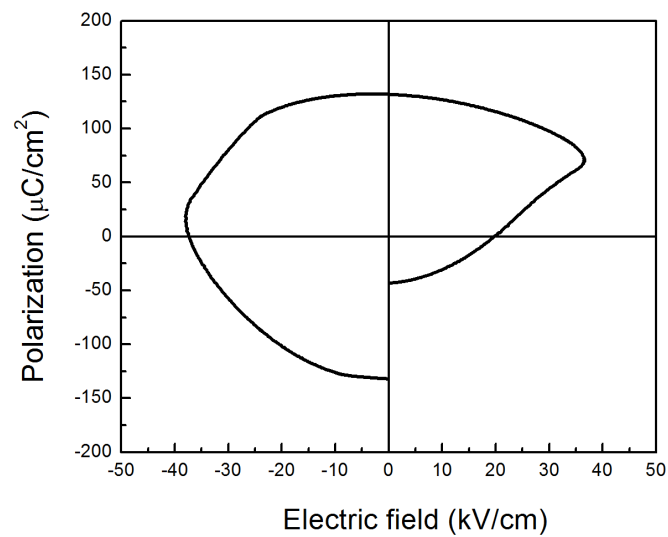

**Fig. S3.** Polarization-electric field (P-E) loop of  $\text{MAPbI}_{3-x}\text{Cl}_x$  based on metal/FE/metal structure (FTO/Au/mp- $\text{Al}_2\text{O}_3$ /MAPb $\text{I}_{3-x}\text{Cl}_x$ /Au in Fig. 4d). The area of the top Au electrode is  $0.1 \text{ cm}^2$ .

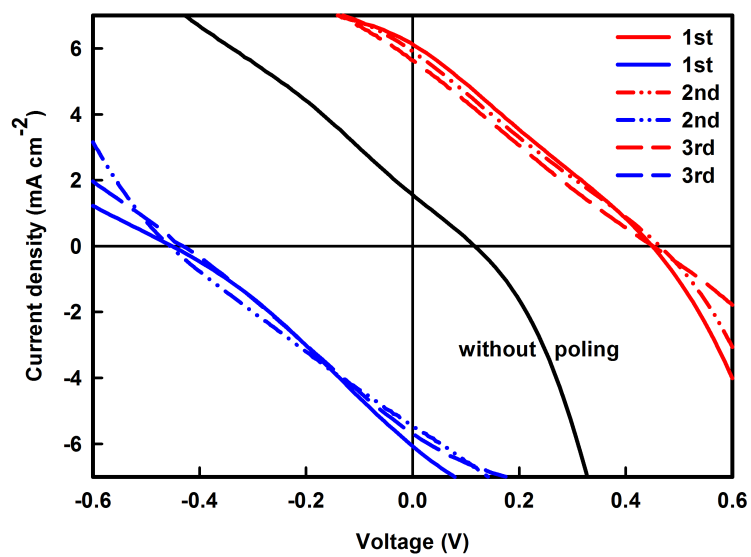

**Fig. S4:** The photovoltaic performance of the ferroelectric solar cell based on Au/MAPbI<sub>3-x</sub>Cl<sub>x</sub>/Au under repeat positive poling (red line) and negative poling (blue line).

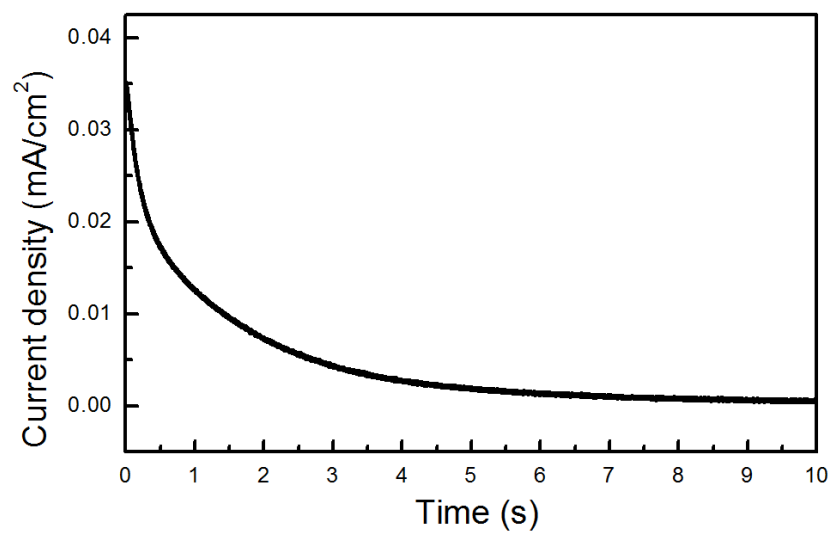

**Fig. S5:** The current flow of the Au/MAPbI<sub>3-x</sub>Cl<sub>x</sub>/Au ferroelectric solar cells after electric poling at -2V and then short circuit.

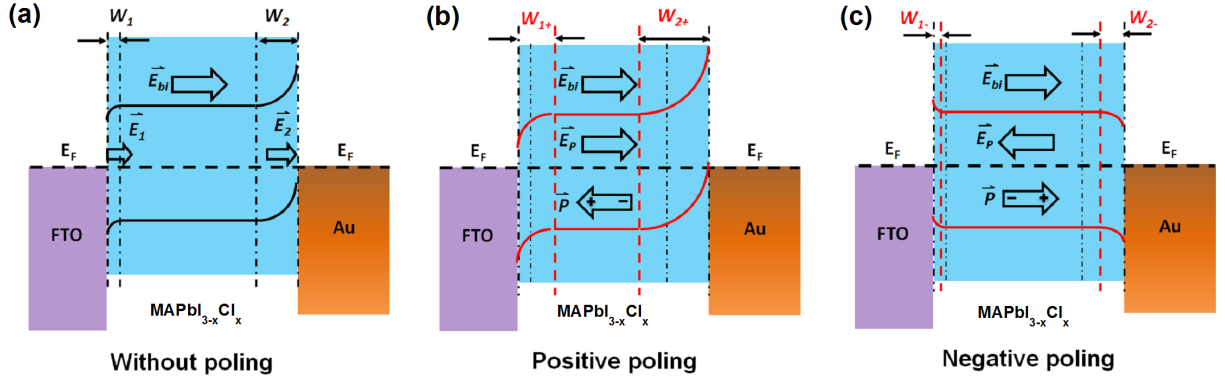

**Fig. S6.** Schematics of band diagram for ferroelectric solar cell based on FTO/mp-Al<sub>2</sub>O<sub>3</sub>/MAPbI<sub>3-x</sub>Cl<sub>x</sub>/Au under different polarization conditions: (a) without poling (b) after positive poling and (c) negative poling.

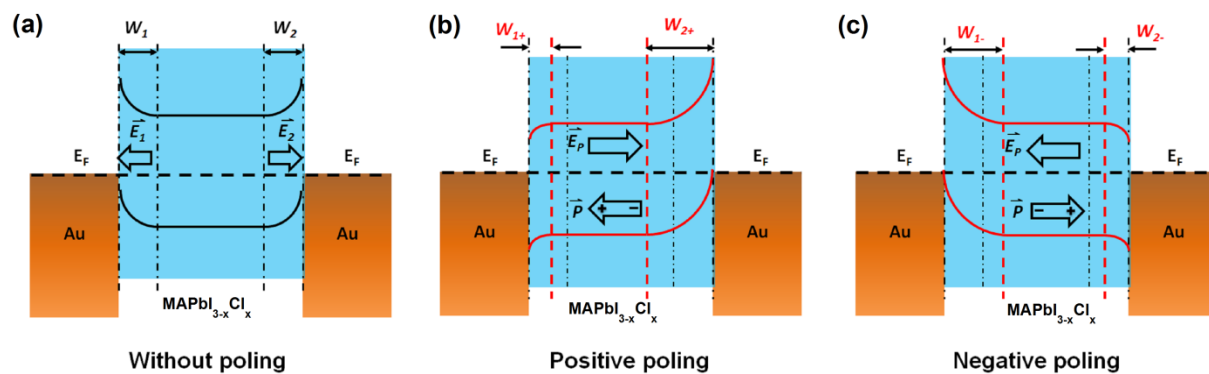

**Fig. S7.** Schematics of band diagram for ferroelectric solar cell based on FTO/Au/mp-Al<sub>2</sub>O<sub>3</sub>/MAPbI<sub>3-x</sub>Cl<sub>x</sub>/Au under different polarization conditions: (a) without poling (b) after positive poling and (c) negative poling.

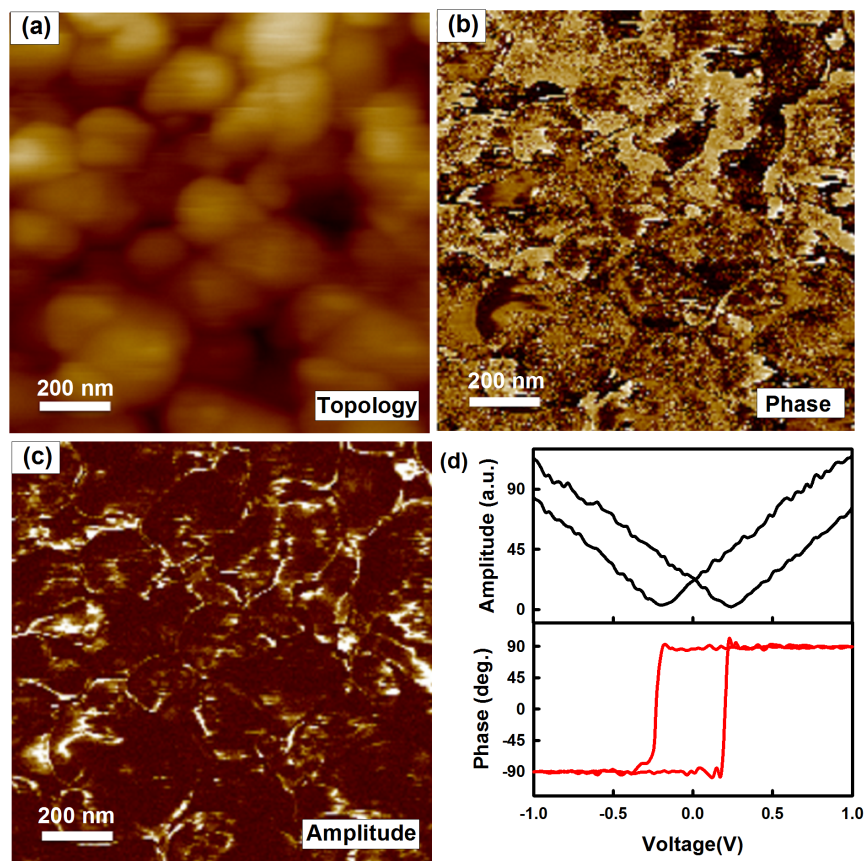

**Fig. S8.** (a) PFM topology, (b) PFM phase image, and (c) PFM amplitude image of the as-grown MAPbI<sub>3</sub> thin film. (d) Piezoresponse amplitude and piezoresponse phase at different bias voltages.

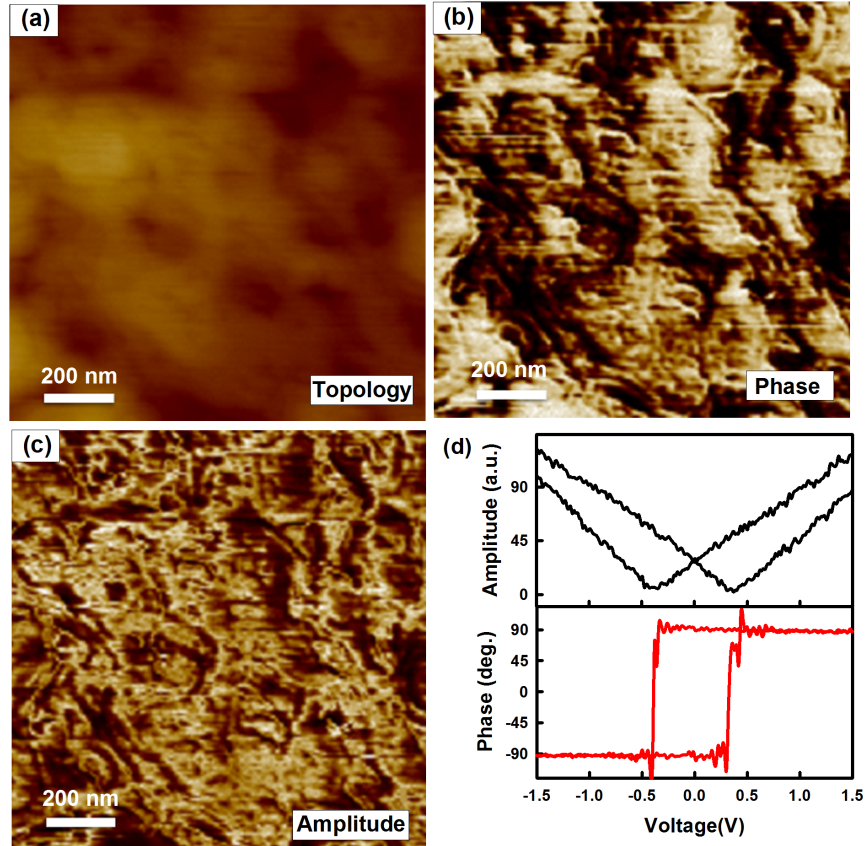

**Fig. S9.** (a) PFM topology, (b) PFM phase image, and (c) PFM amplitude image of the as-grown MAPbBr<sub>3</sub> thin film. (d) Piezoresponse amplitude and piezoresponse phase at different bias voltages.

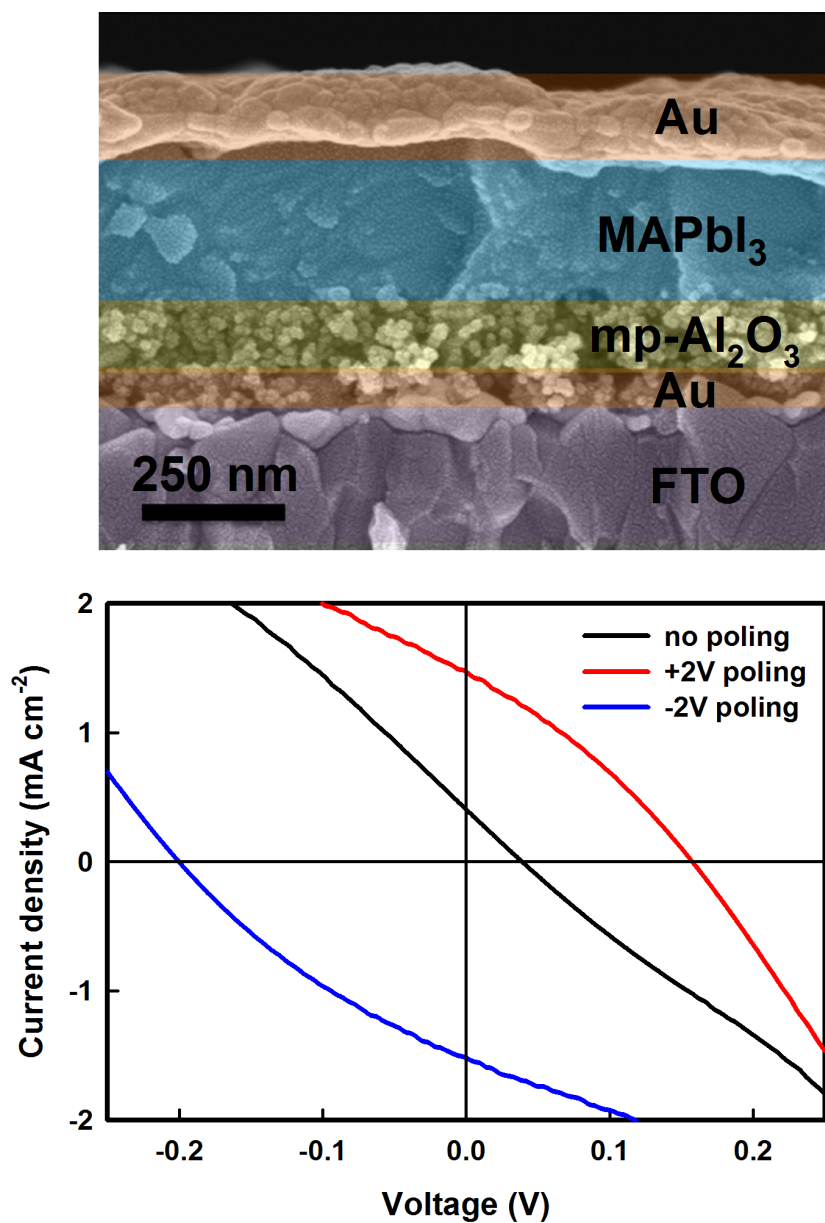

**Fig. S10.** (a) SEM image and (b) J-V plots of the ferroelectric solar cell with Au/MAPbI<sub>3</sub>/Au structure.

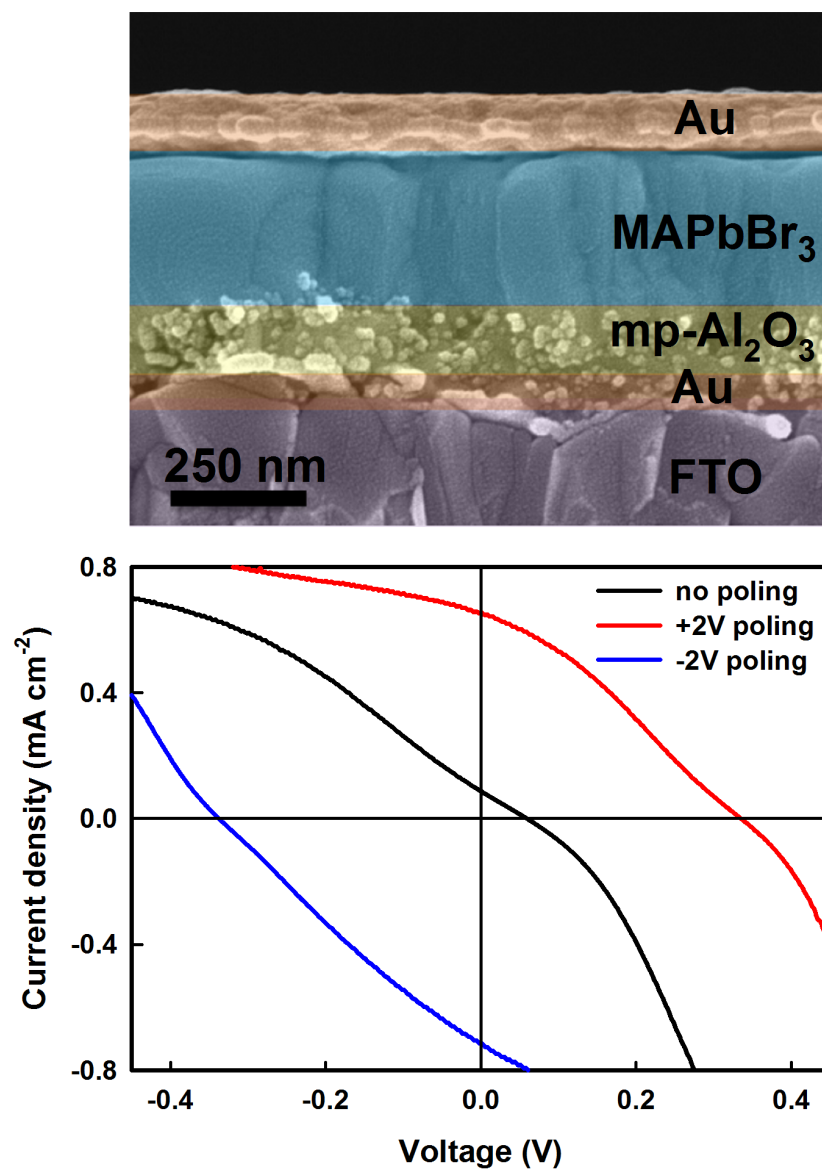

**Fig. S11.** (a) SEM image and (b) J-V plots of the ferroelectric solar cell with Au/MAPbBr<sub>3</sub>/Au structure.

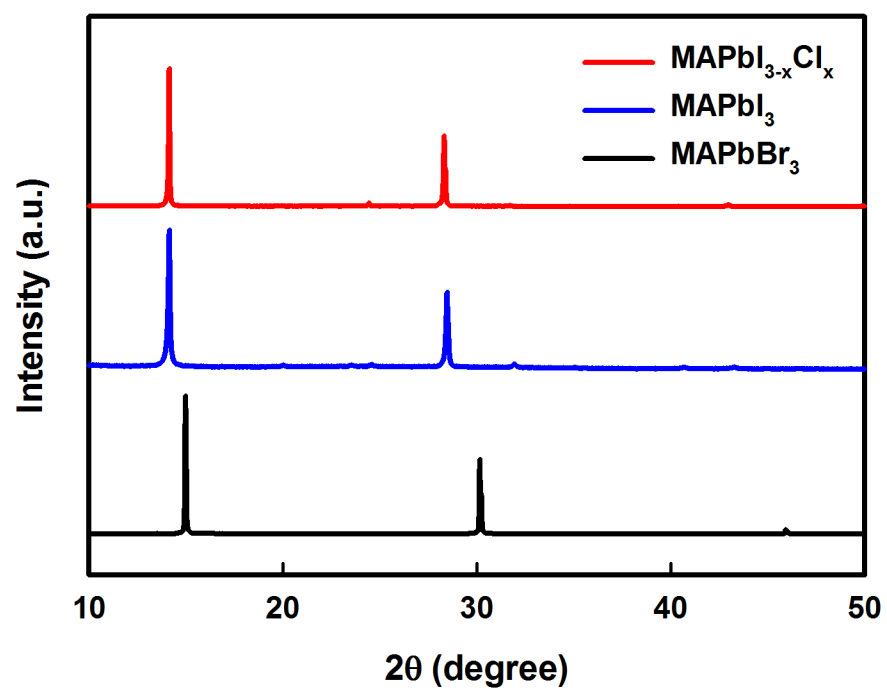

Fig. S12. XRD patterns for the MAPbI<sub>3-x</sub>Cl<sub>x</sub>, MAPbI<sub>3</sub> and MAPbBr<sub>3</sub> thin film on slide glass.

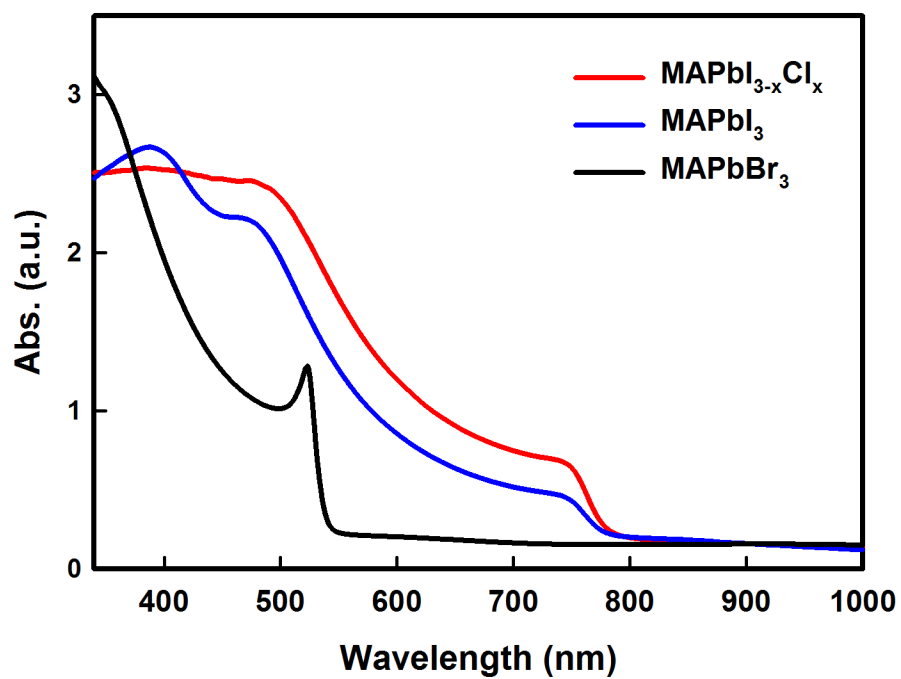

Fig. S13. UV-vis absorption spectra for the MAPbI<sub>3-x</sub>Cl<sub>x</sub>, MAPbI<sub>3</sub> and MAPbBr<sub>3</sub> thin film on slide glass.
